# Supplementary material
Source: PubMed Central journal article supplement (PMC4069242)
Supplement: NIHMS583566-supplement-Supp_TableS1.pdf [file NIHMS583566-supplement-Supp_TableS1.pdf]

**Supplementary Table 1. Characterization of grass pollen-allergic patients**

| Patient No. | Age | Sex <sup>I</sup> | Additional Sensitizations                           | ImmunoCAP<br>Timothy | HLA-DRB1<br>Haplotype | Basophil<br>Stimulation <sup>II</sup> | Phl p 1<br>(IgE, kU <sub>A</sub> /L) | Phl p 5<br>(IgE, kU <sub>A</sub> /L) |
|-------------|-----|------------------|-----------------------------------------------------|----------------------|-----------------------|---------------------------------------|--------------------------------------|--------------------------------------|
| Allergy 17  | 31  | F                | Dust mite, Bermuda, Alder,<br>Cat                   | 4                    | 0401, 1501            | +                                     | 19                                   | 22                                   |
| Allergy 20  | 57  | M                | Alder                                               | 3                    | 0401, 1301            | +                                     | 1.97                                 | 2.06                                 |
| Allergy 53  | 33  | F                | Bermuda                                             | 3                    | 1501, 1601            | +                                     | <0.10                                | 8.20                                 |
| Allergy 78  | 33  | F                | Dust mite, Cat, Bermuda                             | 3                    | 0701, 1501            | +                                     | 4.03                                 | 8.43                                 |
| Allergy 86  | 35  | F                | Dust mite, Bermuda, Alder,<br>Cat, Peanut           | 4                    | 0401, 0701            | +                                     | 16.2                                 | 26.2                                 |
| Allergy 89  | 37  | M                | Bermuda, Alder, Peanut                              | 4                    | 0102, 0401            | +                                     | 15.7                                 | 8.14                                 |
| Allergy 95  | 37  | M                | Dust mite, Bermuda, Cat                             | 3                    | 0401,                 | +                                     | 6.57                                 | 8.38                                 |
| Allergy 101 | 31  | M                | Dust mite, Bermuda, Alder,<br>Yellow Jacket, Peanut | 5                    | 0101, 0401            | +                                     | 19.3                                 | 21.9                                 |
| Allergy 159 | 39  | F                | Dust mite, Alder, Birch,<br>Bermuda                 | 4                    | 0701, 0701            | +                                     | 6.78                                 | 37.2                                 |

<sup>I</sup>F, Female; M, Male

<sup>II</sup> Basophil stimulation assessed with pollen extracts from different species, (+) depicts positive tests for individual grass extracts.
